# Supplementary figures and images for: Effect of Wing Length on the Prevalence of Trypanosomes in Glossina Morsitans Morsitans in Eastern Zambia
Source: Research Square preprint supplement (doi:10.21203/rs.3.rs-269600/v1), 2021-03-03

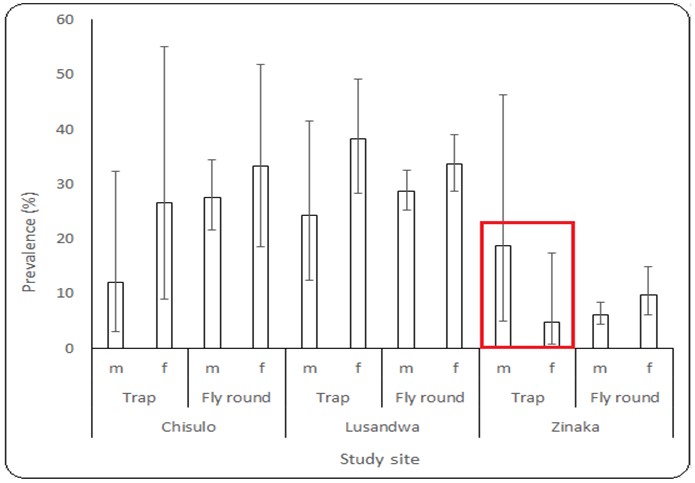

Supplement: Supplementary file 1 [file 4bfb72aeedd652d275540e2a.docx]
